# Supplementary material for: Cardiovascular Disease Burden Attributable to High Sodium Intake in China: A Longitudinal Study from 1990 to 2019
Source: MDPI journal article supplement (doi:10.3390/nu16091307), 2024-04-26
Supplement: s1 [file s1]

Supplementary Table S3. DALYs and ASDR of cardiovascular disease attributable to high sodium intake in 1990 and 2019 and the temporal trends from 1990 to 2019.

| Characteristics | 1990                                   |                                 | 2019                                   |                             | 1990-2019           |                        |
|-----------------|----------------------------------------|---------------------------------|----------------------------------------|-----------------------------|---------------------|------------------------|
|                 | DALYs,                                 | ASDR per                        | DALYs,                                 | ASDR per                    | PAFs %              | EAPC (%) in            |
|                 | No. (95% UI)                           | 100,000 No. (95% UI)            | No. (95% UI)                           | 100,000 No. (95% UI)        | (95% UI)            | ASDR No. (95%CI)       |
| <b>Region</b>   |                                        |                                 |                                        |                             |                     |                        |
| Anhui           | 784687.49<br>(439424.66 to 1194778.43) | 1877.69<br>(1003.27 to 2949.34) | 965362.92<br>(452977.83 to 1583057.23) | 1050.93 (476.39 to 1750.82) | 0.22 (0.11 to 0.35) | -1.84 (-1.99 to -1.69) |
| Beijing         | 196837.90<br>(110004.61 to 293424.22)  | 2020.96<br>(1078.80 to 3068.81) | 218552.07<br>(98356.13 to 365147.55)   | 644.29 (280.95 to 1085.94)  | 0.20 (0.09 to 0.33) | -4.51 (-4.81 to -4.21) |
| Chongqing       | 175320.69<br>(78385.51 to 292366.38)   | 1375.81<br>(578.54 to 2399.12)  | 352932.95<br>(138365.73 to 625756.99)  | 829.16 (328.38 to 1463.14)  | 0.19 (0.08 to 0.31) | -1.45 (-1.59 to -1.32) |
| Fujian          | 274400.79<br>(131768.17 to 446562.40)  | 1326.42<br>(612.88 to 2226.28)  | 295855.24<br>(123756.42 to 509849.90)  | 580.37 (230.91 to 1023.14)  | 0.18 (0.08 to 0.31) | -2.96 (-3.16 to -2.76) |
| Gansu           | 106165.36<br>(20870.77 to 227064.97)   | 693.91<br>(118.38 to 1554.89)   | 233550.70<br>(55571.71 to 472678.18)   | 654.57 (153.17 to 1364.99)  | 0.12 (0.03 to 0.23) | 0.18 (0.02 to 0.34)    |
| Guangdong       | 509653.86<br>(193769.60 to 908953.71)  | 1082.12<br>(387.38 to 1969.90)  | 686032.66<br>(254468.70 to 1239650.26) | 502.53 (174.55 to 928.91)   | 0.15 (0.05 to 0.27) | -1.89 (-2.14 to -1.63) |
| Guangxi         | 320525.41<br>(113166.21 to 572199.21)  | 1064.33<br>(357.80 to 1965.34)  | 439015.16<br>(111311.49 to 885682.85)  | 701.96 (173.87 to 1426.64)  | 0.13 (0.03 to 0.25) | -1.89 (-2.14 to -1.63) |

|                |                                         |                                 |                                         |                             |                     |                        |
|----------------|-----------------------------------------|---------------------------------|-----------------------------------------|-----------------------------|---------------------|------------------------|
| Guizhou        | 408514.43<br>(204242.30 to 652375.73)   | 1843.36<br>(894.08 to 3011.94)  | 516714.27<br>(224459.74 to 892181.67)   | 1143.78 (486.75 to 2002.76) | 0.20 (0.09 to 0.32) | -1.52 (-1.59 to -1.45) |
| Hainan         | 47388.13<br>(16561.26 to 88541.34)      | 1018.95<br>(333.74 to 1948.12)  | 73470.42<br>(21611.4 to 142275.22)      | 638.97 (176.18 to 1271.88)  | 0.13 (0.04 to 0.25) | -1.48 (-1.67 to -1.29) |
| Hebei          | 999755.77<br>(510453.21 to 1552767.06)  | 2109.25<br>(1025.67 to 3375.17) | 1713053.26<br>(815310.07 to 2730597.14) | 1609.99 (721.61 to 2644.41) | 0.22 (0.10 to 0.35) | -0.92 (-1.06 to -0.79) |
| Heilongjiang   | 534545.75<br>(249088.11 to 861411.95)   | 2307.04<br>(991.13 to 3805.43)  | 768590.61<br>(281174.78 to 1370581.94)  | 1190.97 (423.26 to 2184.54) | 0.16 (0.06 to 0.28) | -2.08 (-2.29 to -1.87) |
| Henan          | 1077348.37<br>(544984.08 to 1665587.10) | 1677.89<br>(818.77 to 2651.09)  | 1590980.08<br>(743749.52 to 2620448.46) | 1244.16 (558.03 to 2083.12) | 0.21 (0.10 to 0.34) | -0.75 (-0.84 to -0.65) |
| Hong Kong      | 41914.06<br>(19736.08 to 66765.80)      | 733.92<br>(335.11 to 1191.43)   | 49992.11<br>(19796.47 to 92123.35)      | 360.02 (149.85 to 648.54)   | 0.19 (0.08 to 0.31) | -2.38 (-2.66 to -2.11) |
| Hubei          | 794955.00<br>(402566.69 to 1247550.61)  | 1987.60<br>(958.67 to 3215.89)  | 779144.18<br>(300242.90 to 1325080.08)  | 883.20 (330.02 to 1542.43)  | 0.18 (0.07 to 0.31) | -2.62 (-2.79 to -2.44) |
| Hunan          | 704385.69<br>(308939.5 to 1190041.24)   | 1506.62<br>(624.47 to 2639.40)  | 1043591.79<br>(429456.93 to 1782691.77) | 1052.20 (431.46 to 1818.12) | 0.19 (0.08 to 0.32) | -0.98 (-1.08 to -0.88) |
| Inner Mongolia | 333730.49<br>(174931.76 to 521199.29)   | 2369.77<br>(1165.45 to 3766.85) | 560234.41<br>(283439.71 to 879708.86)   | 1497.47 (711.67 to 2415.84) | 0.23 (0.12 to 0.35) | -1.43 (-1.60 to -1.25) |
| Jiangsu        | 622908.29<br>(300903.68 to 1008237.27)  | 1094.98<br>(496.11 to 1792.44)  | 759173.88<br>(328370.41 to 1283257.22)  | 564.24 (244.33 to 956.53)   | 0.19 (0.08 to 0.31) | -2.63 (-3.46 to -1.79) |

|          |                                         |                                 |                                         |                             |                     |                        |
|----------|-----------------------------------------|---------------------------------|-----------------------------------------|-----------------------------|---------------------|------------------------|
| Jiangxi  | 581260.08<br>(333188.83 to 864808.98)   | 2260.54<br>(1250.46 to 3432.01) | 579900.73<br>(281366.69 to 931800.37)   | 991.56 (464.12 to 1622.19)  | 0.22 (0.10 to 0.35) | -2.63 (-3.46 to -1.79) |
| Jilin    | 573355.82<br>(325243.36 to 847171.94)   | 3328.96<br>(1762.53 to 5021.67) | 595749.35<br>(260034.82 to 986332.69)   | 1322.43 (557.98 to 2232.51) | 0.19 (0.08 to 0.32) | -3.39 (-3.65 to -3.12) |
| Liaoning | 465884.44<br>(186246.59 to 799497.04)   | 1495.14<br>(549.71 to 2628.06)  | 845289.89<br>(336984.45 to 1459955.61)  | 1066.39 (410.11 to 1862.69) | 0.17 (0.07 to 0.30) | -0.90 (-1.10 to -0.70) |
| Macao    | 2745.20<br>(1322.35 to 4433.13)         | 997.20<br>(473.1 to 1616.85)    | 4392.71.00<br>(1947.89 to 7116.76)      | 442.08 (186.17 to 730.45)   | 0.20 (0.09 to 0.32) | -2.82 (-2.96 to -2.67) |
| Ningxia  | 30506.29<br>(9699.78 to 58295.59)       | 1154.14<br>(336.21 to 2274.61)  | 70772.33<br>(25705.48 to 128418.06)     | 891.44 (295.69 to 1680.20)  | 0.15 (0.05 to 0.27) | -0.62 (-0.74 to -0.51) |
| Qinghai  | 54526.41<br>(30154.04 to 82891.27)      | 2053.65<br>(1049.03 to 3244.71) | 111024.00<br>(57043.06 to 172891.94)    | 1594.53 (772.28 to 2562.43) | 0.23 (0.11 to 0.35) | -0.62 (-0.79 to -0.45) |
| Shaanxi  | 472549.21<br>(237672.78 to 745933.69)   | 1979.78<br>(939.40 to 3185.61)  | 726984.88<br>(342208.81 to 1179850.91)  | 1316.37 (600.36 to 2194.50) | 0.21 (0.10 to 0.33) | -1.17 (-1.29 to -1.05) |
| Shandong | 1071222.62<br>(561195.93 to 1720401.21) | 1590.68<br>(792.88 to 2598.74)  | 1539131.65<br>(713282.57 to 2532005.13) | 997.37 (461.57 to 1670.37)  | 0.21 (0.10 to 0.33) | -1.51 (-1.57 to -1.45) |
| Shanghai | 144474.17<br>(67883.86 to 234376.23)    | 991.42<br>(437.05 to 1633.62)   | 165059.36<br>(70019.30 to 282140.72)    | 381.45 (159.60 to 662.46)   | 0.17 (0.07 to 0.29) | -3.59 (-3.89 to -3.29) |
| Shanxi   | 298393.43<br>(107221.54 to 552304.67)   | 1376.48<br>(456.49 to 2605.06)  | 548722.58<br>(220622.97 to 967829.76)   | 1076.83 (405.19 to 1971.27) | 0.17 (0.07 to 0.30) | -0.78 (-0.91 to -0.66) |

|          |                                         |                                 |                                        |                              |                     |                        |
|----------|-----------------------------------------|---------------------------------|----------------------------------------|------------------------------|---------------------|------------------------|
| Sichuan  | 1034096.48<br>(465257.46 to 1743564.68) | 1211.92<br>(508.70 to 2115.74)  | 1124609.17<br>(453433.41 to 1983319)   | 846.99 (336.86 to 1495.25)   | 0.18 (0.08 to 0.30) | -0.80 (-1.06 to -0.54) |
| Tianjin  | 103936.66<br>(42862.57 to 175464.72)    | 1335.38<br>(521.17 to 2313.49)  | 167433.99<br>(57598.75 to 303115.84)   | 745.78 (244.56 to 1384.21)   | 0.15 (0.05 to 0.27) | -1.77 (-2.15 to -1.39) |
| Tibet    | 62413.01<br>(33451.63 to 95774.01)      | 4018.05<br>(2064.38 to 6332.62) | 72308.19<br>(40229.91 to 109043.41)    | 2440.51 (1274.33 to 3772.27) | 0.27 (0.15 to 0.41) | -1.97 (-2.11 to -1.83) |
| Xinjiang | 188840.20<br>(83695.05 to 314757.70)    | 1977.04<br>(798.62 to 3414.63)  | 511481.92<br>(268318.86 to 804495.29)  | 1877.72 (934.52 to 3041.33)  | 0.24 (0.12 to 0.37) | 0.07 (-0.08 to 0.23)   |
| Yunnan   | 355953.24<br>(154167.45 to 595292.57)   | 1351.70<br>(554.38 to 2325.10)  | 654473.53<br>(289548.54 to 1098343.44) | 1115.25 (467.87 to 1907.43)  | 0.19 (0.08 to 0.31) | -0.44 (-0.65 to -0.23) |
| Zhejiang | 479190.35<br>(274410.67 to 723710.36)   | 1987.60<br>(958.67 to 3215.89)  | 545047.42<br>(288910.64 to 846279.27)  | 614.14 (318.24 to 961.53)    | 0.24 (0.13 to 0.37) | -2.79 (-2.94 to -2.65) |

---

DALYs=disability-adjusted life years; ASDR=age-standardized DALYs rate; PAF=population attributable fraction; EAPC=estimated annual percentage change.
