# Supplementary material for: Cardiovascular Disease Burden Attributable to High Sodium Intake in China: A Longitudinal Study from 1990 to 2019
Source: MDPI journal article supplement (doi:10.3390/nu16091307), 2024-04-26
Supplement: s1 [file s1]

**Supplementary Table S2. Deaths and ASMR of cardiovascular disease attributable-high sodium intake in 1990 and 2019 and the temporal trends from 1990-2019.**

| Characteristics |  | 1990                            |                         | 2019                             |                         | 1990-2019           |                        |
|-----------------|--|---------------------------------|-------------------------|----------------------------------|-------------------------|---------------------|------------------------|
| Region          |  | Deaths cases,                   | ASMR per                | Deaths cases,                    | ASMR per                | PAFs %              | EAPC (%) in            |
|                 |  | No. (95% UI)                    | 100,000 No. (95% UI)    | No. (95% UI)                     | 100,000 No. (95% UI)    | (95% UI)            | ASMR No. (95% CI)      |
| Anhui           |  | 28300.82 (14713.35 to 44312.37) | 81.82 (38.37 to 134.66) | 42365.07 (16674.31 to 75509.82)  | 49.64 (18.75 to 89.83)  | 0.18 (0.07 to 0.31) | -1.48 (-1.63 to -1.33) |
| Beijing         |  | 7488.02 (3862.88 to 11437.14)   | 90.30 (43.45 to 144.21) | 8999.36 (3470.48 to 16079.41)    | 28.94 (10.47 to 52.37)  | 0.16 (0.06 to 0.29) | -4.47 (-4.78 to -4.17) |
| Chongqing       |  | 6186.35 (2473.33 to 10825.82)   | 57.01 (19.68 to 105.62) | 15689.27 (5177.91 to 30054.07)   | 38.24 (12.06 to 74.8)   | 0.15 (0.05 to 0.27) | -1.00 (-1.17 to -0.83) |
| Fujian          |  | 10179.05 (4474.88 to 17345.06)  | 57.35 (22.84 to 102.39) | 12682.98 (4233.43 to 23787.90)   | 27.77 (8.67 to 53.34)   | 0.14 (0.05 to 0.27) | -2.50 (-2.7 to -2.29)  |
| Gansu           |  | 3482.44 (580.02 to 7834.64)     | 27.86 (3.75 to 67.23)   | 9058.00 (1805.78 to 19719.91)    | 28.35 (4.99 to 66.32)   | 0.09 (0.02 to 0.19) | 0.56 (0.37 to 0.75)    |
| Guangdong       |  | 19397.98 (6396.47 to 36491.31)  | 47.25 (13.88 to 94.46)  | 26757.60 (7666.72 to 53343.85)   | 21.74 (5.62 to 45.16)   | 0.11 (0.03 to 0.23) | -1.77 (-2.05 to -1.49) |
| Guangxi         |  | 12028.01 (3673.07 to 22895.45)  | 44.93 (12.21 to 90.07)  | 18553.34 (4012.57 to 39340.86)   | 31.56 (6.42 to 68.75)   | 0.10 (0.02 to 0.22) | -1.77 (-2.05 to -1.49) |
| Guizhou         |  | 14604.43 (6794.08 to 24247.93)  | 75.21 (31.95 to 129.38) | 20888.09 (7684.4 to 38367.14)    | 49.77 (16.99 to 94.15)  | 0.16 (0.06 to 0.28) | -1.23 (-1.34 to -1.12) |
| Hainan          |  | 1775.32 (530.04 to 3489.34)     | 43.42 (11.63 to 88.71)  | 2918.63 (687.46 to 6069.51)      | 28.24 (5.94 to 61.34)   | 0.10 (0.02 to 0.21) | -1.30 (-1.54 to -1.07) |
| Hebei           |  | 38646.85 (17548.55 to 63192.08) | 93.83 (38.79 to 158.93) | 67766.87 (27985.58 to 115833.93) | 70.79 (26.25 to 128.23) | 0.18 (0.07 to 0.3)  | -0.87 (-1.04 to -0.70) |
| Heilongjiang    |  | 17793.13 (7599.22 to 29396.77)  | 95.22 (34.91 to 167.84) | 28523.97 (9065.77 to 54018.82)   | 50.31 (13.86 to 103.86) | 0.12 (0.03 to 0.24) | -1.98 (-2.21 to -1.74) |

|                |                                 |                          |                                  |                         |                     |                        |
|----------------|---------------------------------|--------------------------|----------------------------------|-------------------------|---------------------|------------------------|
| Henan          | 41009.79 (18848.89 to 66550.96) | 73.07 (30.18 to 124.8)   | 65058.13 (25447.86 to 115571.80) | 55.23 (20.22 to 101.41) | 0.16 (0.06 to 0.29) | -0.60 (-0.72 to -0.48) |
| Hong Kong      | 1654.80 (696.50 to 2806.60)     | 31.67 (12.16 to 55.75)   | 2150.85 (660.92 to 4439.26)      | 13.90 (4.64 to 27.92)   | 0.15 (0.05 to 0.27) | -2.83 (-3.12 to -2.53) |
| Hubei          | 30182.37 (13854.17 to 50146.24) | 87.37 (35.47 to 152.3)   | 32773.79 (10915.76 to 60719.68)  | 41.11 (12.28 to 79.43)  | 0.14 (0.04 to 0.27) | -2.33 (-2.56 to -2.11) |
| Hunan          | 25800.85 (10130.72 to 46295.77) | 64.47 (22.52 to 122.3)   | 44372.51 (15393.87 to 82953.04)  | 48.11 (15.35 to 93.57)  | 0.15 (0.05 to 0.28) | -0.68 (-0.80 to -0.56) |
| Inner Mongolia | 11508.91 (5534.85 to 18402.90)  | 100.51 (43.61 to 167.96) | 21194.01 (9584.76 to 35084.53)   | 66.35 (26.43 to 116.65) | 0.18 (0.08 to 0.31) | -1.22 (-1.39 to -1.05) |
| Jiangsu        | 24574.19 (10732.36 to 40684.44) | 50.46 (20.21 to 87.43)   | 33128.31 (11795.37 to 61699.68)  | 25.50 (8.48 to 48.85)   | 0.15 (0.05 to 0.27) | -2.42 (-3.21 to -1.63) |
| Jiangxi        | 21327.18 (11264.71 to 32675.02) | 96.36(46.49 to 154.65)   | 24731.19 (10492.98 to 42585.82)  | 47.34 (17.99 to 85.09)  | 0.18 (0.07 to 0.31) | -2.42 (-3.21 to -1.63) |
| Jilin          | 19922.32 (10410.24 to 30111.75) | 139.35(65.41 to 219.91)  | 22891.75 (8730.61 to 40199.96)   | 57.18 (19.34 to 104.61) | 0.15 (0.05 to 0.28) | -3.23 (-3.52 to -2.94) |
| Liaoning       | 17148.34 (6038.51 to 30681.95)  | 65.85 (20.13 to 124.13)  | 32866.13 (10563.84 to 61932.40)  | 44.78 (13.11 to 88.38)  | 0.13 (0.04 to 0.25) | -1.05 (-1.25 to -0.86) |
| Macao          | 107.38 (44.53 to 186.84)        | 40.42 (16.3 to 70.67)    | 158.76 (56.00 to 290.29)         | 16.90 (5.64 to 31.78)   | 0.16 (0.06 to 0.29) | -3.07 (-3.22 to -2.92) |
| Ningxia        | 1039.23 (302.09 to 2053.28)     | 48.40 (11.58 to 101.92)  | 2681.04 (813.50 to 5203.30)      | 39.82 (9.90 to 82.16)   | 0.11 (0.03 to 0.23) | -0.32 (-0.47 to -0.18) |
| Qinghai        | 1770.85 (923.08 to 2764.53)     | 85.03 (38.57 to 141.91)  | 4081.31 (1935.00 to 6686.12)     | 71.14 (30.04 to 124.28) | 0.18 (0.08 to 0.31) | -0.28 (-0.50 to -0.05) |
| Shaanxi        | 17131.53 (7980.26 to 27969.13)  | 85.14 (36.69 to 144.93)  | 30081.75 (12621.71 to 51956.40)  | 61.59 (23.25 to 111.58) | 0.17 (0.07 to 0.30) | -0.76 (-0.93 to -0.59) |
| Shandong       | 41378.98 (19401.39 to 68828.63) | 70.99 (30.02 to 124.08)  | 65741.60 (25815.99 to 116443.20) | 45.88 (16.51 to 84.24)  | 0.16 (0.06 to 0.29) | -1.32 (-1.42 to -1.22) |
| Shanghai       | 5838.51 (2415.15 to 9885.65)    | 46.48 (17.62 to 82.23)   | 6994.25 (2249.26 to 13347.51)    | 16.91 (5.31 to 33.04)   | 0.13 (0.04 to 0.24) | -3.85 (-4.19 to -3.50) |
| Shanxi         | 10806.46 (3230.82 to 20782.59)  | 58.18 (14.97 to 118.87)  | 21076.38 (7154.15 to 39994.57)   | 46.91 (14.05 to 92.7)   | 0.13 (0.04 to 0.25) | -0.62 (-0.75 to -0.49) |

|          |                                 |                         |                                 |                          |                     |                        |
|----------|---------------------------------|-------------------------|---------------------------------|--------------------------|---------------------|------------------------|
| Sichuan  | 37507.45 (15097.31 to 66574.98) | 52.36 (18.57 to 97.78)  | 47068.70 (16000.22 to 88296.43) | 38.02 (11.97 to 73.70)   | 0.14 (0.05 to 0.27) | -0.61 (-0.89 to -0.33) |
| Tianjin  | 3834.44 (1461.56 to 6714.63)    | 57.76 (19.23 to 108.08) | 6375.62 (1827.69 to 12531.96)   | 31.71 (8.27 to 65.21)    | 0.12 (0.03 to 0.23) | -1.81 (-2.18 to -1.43) |
| Tibet    | 2134.64 (1084.30 to 3392.78)    | 159.09(73.14 to 265.75) | 2579.39 (1312.44 to 4030.69)    | 105.86 (48.01 to 174.27) | 0.23 (0.11 to 0.38) | -1.55 (-1.66 to -1.44) |
| Xinjiang | 6307.47 (2593.9 to 10933.50)    | 80.57 (28.15 to 151.48) | 18811.71 (8988.6 to 30966.61)   | 82.32 (35.03 to 142.37)  | 0.20 (0.08 to 0.33) | 0.38 (0.26 to 0.50)    |
| Yunnan   | 12453.30 (4872.16 to 21773.45)  | 54.27 (19.05 to 99.89)  | 24980.07 (9513.89 to 43680.73)  | 47.63 (17.00 to 87.60)   | 0.15 (0.05 to 0.27) | -0.15 (-0.38 to 0.08)  |
| Zhejiang | 19025.02 (10072.54 to 29981.56) | 62.32 (31.1 to 102.02)  | 24587.34 (10418.25 to 41109.62) | 29.81 (12.10 to 50.79)   | 0.20 (0.08 to 0.33) | -2.51 (-2.67 to -2.35) |

---

ASMR=age-standardized mortality rate; PAF=population attributable fraction; EAPC=estimated annual percentage change.
