# Supplementary material for: Cardiovascular Disease Burden Attributable to High Sodium Intake in China: A Longitudinal Study from 1990 to 2019
Source: MDPI journal article supplement (doi:10.3390/nu16091307), 2024-04-26
Supplement: s1 [file s1]

**Supplementary Table S1** Codes in (ICD-10) for major CVD subcategories.

|    |                                                                                                                              |
|----|------------------------------------------------------------------------------------------------------------------------------|
| 1  | cardiomyopathy and myocarditis (B33.2, I40-I41.9, I42.1-I42.8, I43-I43.9, I51.4);                                            |
| 2  | non-rheumatic valvular heart disease (I34-I37.9);                                                                            |
| 3  | atrial fibrillation and flutter (I48-I48.9);                                                                                 |
| 4  | endocarditis (I33-I33.9, I38-I39.9);                                                                                         |
| 5  | stroke (G45-G46.8, I60-I62.9, I63-I63.9, I65-I66.9, I67.2-I67.3, I67.5-I67.6, I67.0-I67.1, I68.1-I68.2, I69.0-I69.2, I69.3); |
| 6  | rheumatic heart disease (I01-I01.9, I02.0, I05-I09.9);                                                                       |
| 7  | hypertensive heart disease (I11-I11.9);                                                                                      |
| 8  | ischemic heart disease (I20-I25.9);                                                                                          |
| 9  | aortic aneurysm (I71-I71.9);                                                                                                 |
| 10 | peripheral vascular disease (I70.2-I70.8, I73-I73.9);                                                                        |
| 11 | other cardiovascular and circulatory diseases (the rest of the CVD codes).                                                   |
